# Supplementary material for: Solvothermal-assisted preparation of PdRhTe nanowires as an efficient electrocatalyst for ethylene glycol oxidation
Source: Royal Society of Chemistry journal article supplement (doi:10.1039/d1nj02654b), 2021-01-01
Supplement: d1nj02654b1.pdf [file d1nj02654b1.pdf]

**Electronic Supplementary Information (ESI) for:**

**Solvothermal-assisted preparation of PdRhTe nanowires as efficient electrocatalyst for ethylene glycol oxidation**

*Peiyan Bi,<sup>\*a</sup> Xiaoping Wu,<sup>b</sup> Shuwen Xiong,<sup>a</sup> and Wei Hong<sup>\*c</sup>*

<sup>a</sup> Jiangxi Province Key Laboratory of Polymer Micro/Nano Manufacturing and Devices, School of Chemistry, Biology and Materials Science, East China University of Technology, Nanchang 330013, China.

<sup>b</sup> School of Chemical Engineering and Light Industry, Guangzhou Key Laboratory of Clean Transportation Energy Chemistry, Guangdong University of Technology, Guangzhou 510006, China.

<sup>c</sup> School of Mechanical and Aerospace Engineering, Nanyang Technological University, 639798, Singapore.

Corresponding authors: [bipychem@ecit.cn](mailto:bipychem@ecit.cn), [weihongchem@hotmail.com](mailto:weihongchem@hotmail.com)

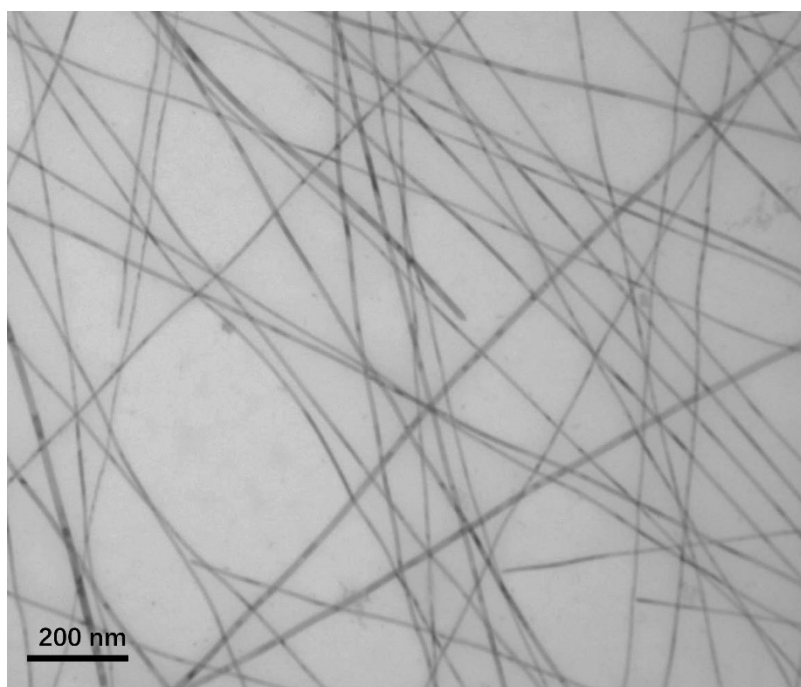

**Fig. S1** Typical TEM image of the Te NWs.

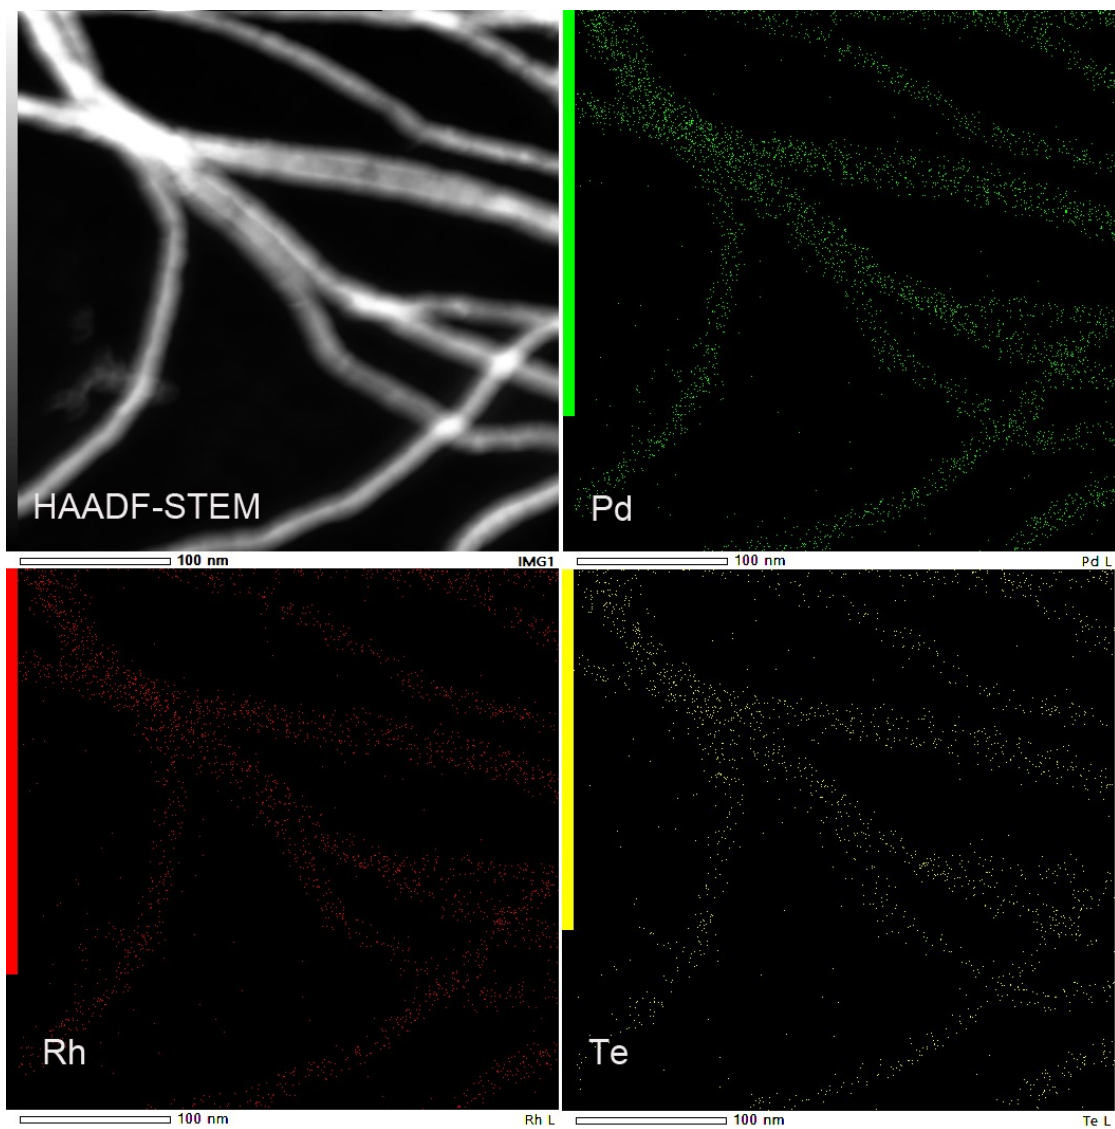

**Fig. S2** Typical HAADF-STEM and elemental mapping images of the as-prepared  $\text{Pd}_{45}\text{Rh}_{28}\text{Te}_{27}$  NWs.

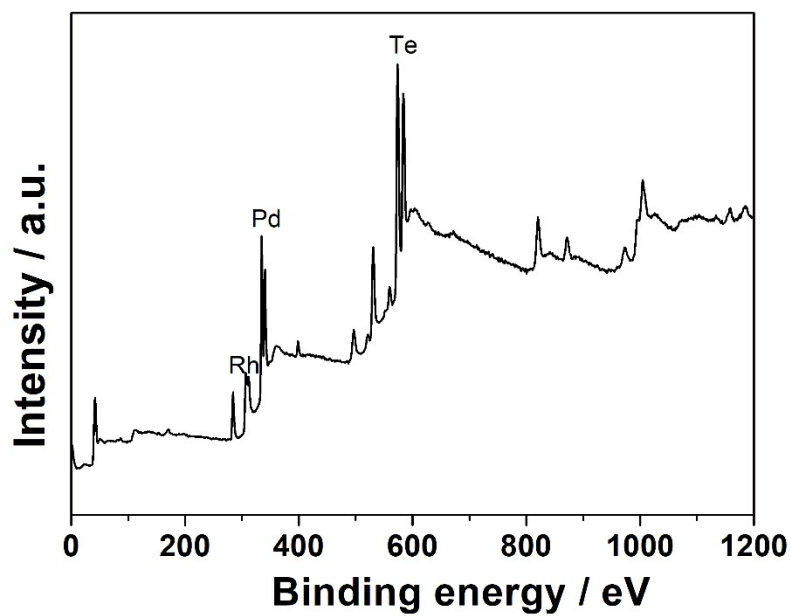

**Fig. S3** XPS survey spectra of the Pd<sub>45</sub>Rh<sub>28</sub>Te<sub>27</sub> NWs. The sample was dipped onto a commercial glass to form a thin film for the XPS measurements.

**Formula S1**

$$\text{Activity} = j / W,$$

In the formula,  $j$  represents peak current value (mA) of the forward scan in the CV curves,  $W$  represents the loading weight of Pd (mg) on the electrode.

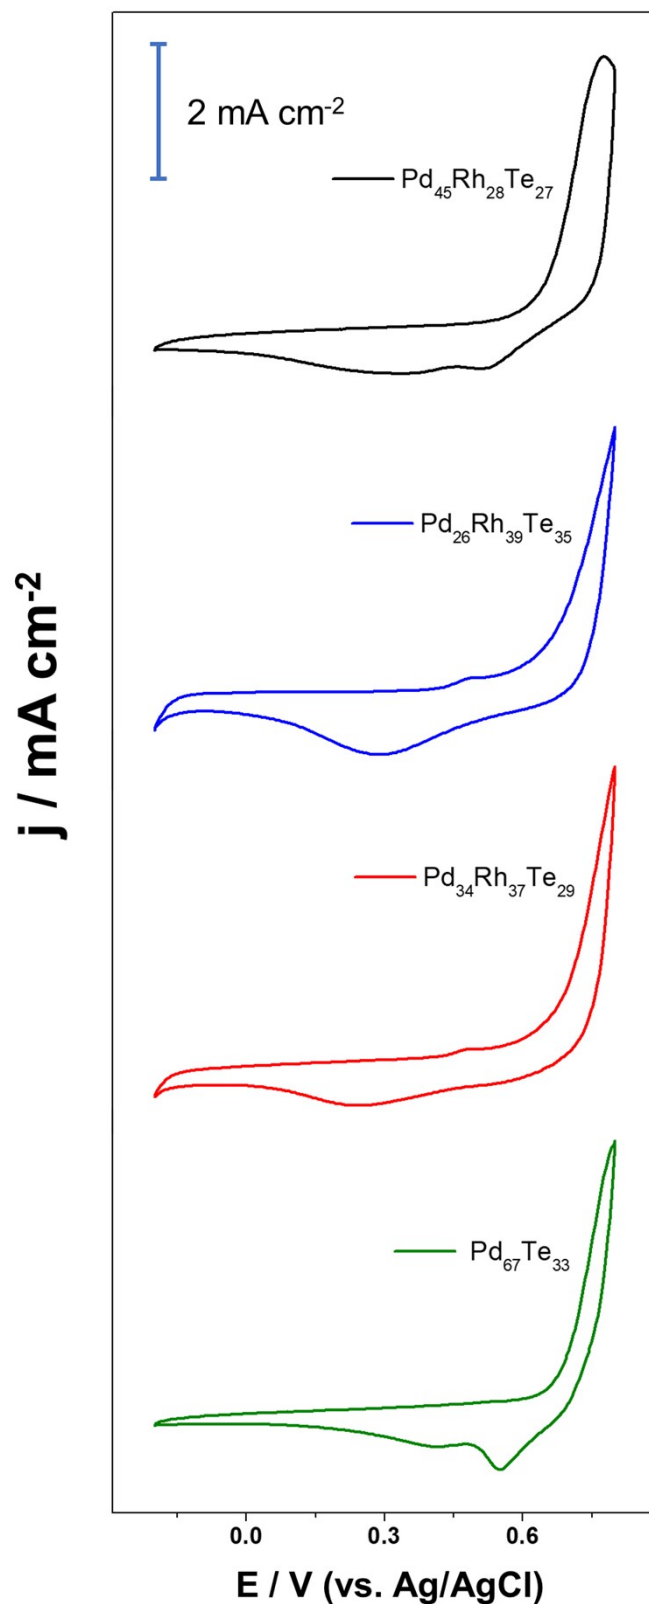

**Fig. S4** CV curves in  $0.5 \text{ mol L}^{-1} \text{ H}_2\text{SO}_4$  over different electrocatalysts, the scan rate is  $50 \text{ mV s}^{-1}$ . The electrochemical surface area (ECSA) of different PdRhTe NWs was calculated according to the reported literatures. The calculations were based on the

assumption that the charge density is  $430 \mu\text{C cm}^{-2}$  for a fully covered  $\text{Pd}(\text{OH})_2$  monolayer, the ECSA ( $\text{m}^2 \text{g}^{-1}$ ) values of the PdRhTe NWs can be calculated by the following formula,

$$\text{ECSA} = 100 * Q_{\text{Pd}(\text{OH})_2} / (430 * M),$$

In the formula, M represents the loading weight of Pd (g) on the electrode,  $Q_{\text{Pd}(\text{OH})_2}$  (C) is the total charge amount (C).

## References

- 1 L., Xiao; L., Zhuang; Y., Liu; J., Lu; H. c. D., Abruña, *J. Am. Chem. Soc.* 2008, **131**, 602-608.
- 2 W. Hong, C. Shang, J. Wang and E. Wang, *Energy Environ. Sci.*, 2015, **8**, 2910-2915.
- 3 W. Hong, J. Wang and E. Wang, *ACS Appl. Mater. Interfaces*, 2014, **6**, 9481-9487.
